# Supplementary material
Source: PubMed Central journal article supplement (PMC4505240)
Supplement: AAC.04856-14_zac008154239so1.pdf [file AAC.04856-14_zac008154239so1.pdf]

## SUPPLEMENTAL MATERIAL: LIPIDS ANALYSES

### MATERIALS AND METHODS

**Lipids extraction.** Lipids from bacterial cells grown as surface pellicle on Sauton's fluid medium were extracted with mixtures of  $\text{CHCl}_3$  and  $\text{CH}_3\text{OH}$  according to standard protocols as described previously (1,2).

**Mild alkaline deacylation of lipids.** In order to eliminate alkali-labile lipids such as TAG, phospholipids and trehalose esters, lipid fractions were suspended in  $\text{CHCl}_3/\text{CH}_3\text{OH}$  (2:1 v/v) and incubated at  $37^\circ\text{C}$  for 60 min with an equal volume of 0.2 M NaOH in methanol for mild alkaline deacylation. The mixture was neutralized with glacial acetic acid, then concentrated and finally dissolved in  $\text{CHCl}_3$ . The organic phase was washed with water and dried.

**Saponification of lipids.** Strong saponification of lipids was realized with 5% KOH in methoxyethanol at  $110^\circ\text{C}$  for 3 hours. After acidification, the resulting fatty acids were extracted with diethyl ether and methylated by the addition of a diazomethane solution in ether. The resulting esters were analysed both by TLC with  $\text{CH}_2\text{Cl}_2$  as running solvent and characterized by their Mc-Lafferty rearrangements ( $m/z$  74 or  $m/z$  88 for methyl branch esters) using a gas chromatography/mass spectrometry (GC/MS) apparatus.

**Acid methanolysis of lipids for cleavage of osidic bonds.** Acid methanolysis of lipids was realized in a screw-capped tube using 1M  $\text{CH}_3\text{OH}/\text{HCl}$  (prepared by the acetyl chloride reaction on methanol in anhydrous conditions) at  $80^\circ\text{C}$  overnight under nitrogen atmosphere. After evaporation by successive additions of methanol and drying and after the separation on preparative TLC, the aglycone lipid was purified and analysed by MALDI mass spectrometry.

**Trimethylsilyl derivatisation of hydroxyl functions (TMS).** TMS was performed as described previously (3). Lipid samples were dissolved in 200  $\mu\text{l}$  of anhydrous pyridine

26 followed by the addition of 100 µl hexamethyldisilazane and 50 µl of trimethylchlorosilane.  
27 The mixture was incubated at room temperature for 30 min and then dried under nitrogen.  
28 The derivatives were solubilised in petroleum ether for GC and GC/MS analyses.

29 **Lipid purification and visualisation.** Intact and deacylated lipids from mild alkaline  
30 treatment were first comparatively analysed by thin-layer chromatography (TLC) Silica Gel  
31 60 plates (Macherey-Nagel) in various solvent systems, mainly petroleum ether/diethyl ether  
32 9:1 (v/v) for phthiocerol dimycocerosates (PDIM) and triacyl glycerol (TAG) and  
33 CHCl<sub>3</sub>/CH<sub>3</sub>OH 9:1 (v/v) for phenol glycolipid (PGL). Visualisation was performed using  
34 10% phosphomolybdic acid and charring for PDIM and 0.2% anthrone solution in  
35 concentrated H<sub>2</sub>SO<sub>4</sub> followed by heating for PGL (4).

36 In order to allow further characterizations, purification of complex lipids as PDIM and PGL  
37 was realized by Florisil column chromatography followed by preparative TLC and infrared  
38 (IR) spectroscopy. For apolar lipids such as DIM, the samples were dissolved in petroleum  
39 ether and loaded onto a Florisil column prepared in petroleum ether and compounds were  
40 eluted with a gradient of diethyl ether in petroleum ether. For glycolipids, the samples were  
41 dissolved in CHCl<sub>3</sub> and lipids were eluted with increasing concentrations of methanol in  
42 CHCl<sub>3</sub>, the major phenol glycolipid of BCG being eluted with CHCl<sub>3</sub>/CH<sub>3</sub>OH 95:5 (v/v). The  
43 separation was followed on thin-layer chromatography (TLC).

44 We also performed lipids labelling using [<sup>14</sup>C]acetate (Amersham). After 16 h incorporation  
45 in 30 ml Sauton's fluid medium containing 1.5% glycerol and 1.2 MBq sodium [<sup>14</sup>C]acetate  
46 (Amersham) and mid-exponential-phase surface-pellicle grown bacteria, the reaction was  
47 stopped by centrifugation and washing. The lipids were isolated by extraction with glass  
48 beads as previously described. The <sup>14</sup>C-labelled lipids were separated on TLC and visualised  
49 with a Typhoon PhosphorImager (Amersham Biosciences).

50 ***Instrumentation for lipid characterization***

51 GC/MS analyses were performed in the electron-impact mode on an HP5889X mass  
52 spectrometer (electron energy, 70 eV) coupled to an HP5890 series II gas chromatograph  
53 fitted with OV1 capillary column (0.30 mm x 25 m) using helium gas. The injector  
54 temperature was set at 260°C and the temperature separation program increased from 100°C  
55 to 300°C at the rate of 5°C min<sup>-1</sup> followed by 10 min at 300°C

56 <sup>1</sup>H-Nuclear magnetic resonance spectroscopy experiments were carried out at 296°K on a on  
57 a Bruker AVANCE spectrometer operating at 600,13 MHz with a 5mm triple resonance TCI  
58 <sup>1</sup>H <sup>13</sup>C <sup>15</sup>N pulsed field z-gradient cryoprobe. Samples were dissolved in 99.9% CDCl<sub>3</sub>.  
59 Chemical shifts are expressed in ppm using the chloroform signal as an internal reference  
60 (7.23 ppm).

61 Infrared spectra of samples placed as films on NaCl discs were recorded using a Perkin-Elmer  
62 Life Sciences Fourier transform IR 1600 spectrometer.

63 Purified molecules were analysed by matrix-assisted laser desorption-ionisation time-of-flight  
64 (MALDI TOF) mass spectrometry using the positive mode, as previously described (1, 5).  
65 Spectra were acquired in reflectron mode with an Applied Biosystems 4700 Analyzer mass  
66 spectrometer (Applied Biosystems, Voyager DE-STR, Framingham, MA) equipped with an  
67 Nd:YAG laser (wavelength 355 nm; pulse <500ps; repetition rate 200Hz). A total of 2500  
68 shots were accumulated and mass spectrometry data were acquired with the default  
69 calibration for the instrument. The matrix was 2,5-dihydroxybenzoic acid (10 mg mL<sup>-1</sup> in  
70 CHCl<sub>3</sub>/CH<sub>3</sub>OH 1:1, v/v).

## 71 **RESULTS**

72  
73 Data from TLC analyses and radio-TLC of <sup>14</sup>C-acetate labelled lipids indicated a similar  
74 composition in ubiquitous lipids in the *Δcpn60.1* mutant and wild type (WT) strain except for  
75 the absence of phthiocerol derivative waxes, the so-called PDIM A and B for phthiocerol and  
76 phthiodiolone dimycocerosates, in the *Δcpn60.1* mutant (data not shown). A complete

77 analysis of the extractable lipid of wild type,  $\Delta cpn60.1$  and complemented strains was  
78 performed in order to understand the cause of the alterations of the cell wall integrity.

79 Identification of waxes was realized by MALDI-TOF MS on the lipid extract after mild  
80 alkaline methanolysis in order to eliminate ubiquitous alkali-labile lipids such as glycerides  
81 and phospholipids. The remaining alkali-stable lipids (liberated mycolic acids, PDIM, and  
82 phenolic glycolipid PGL) were easily characterized by MALDI-TOF MS.

83 As shown in Fig. S1A, two main clusters of molecular ions with sodium adducts  $[M+Na]^+$   
84 were observed in the mass spectrum of the WT strain, one from  $m/z$  1174 to 1390 and another  
85 one from  $m/z$  1446 to 1572. The first cluster contained mycolic acid methyl esters ( $\alpha$ -  
86 mycolates and keto-mycolates), diacyl phthiocerol (DIM A), and diacyl phthiodiolone (DIM  
87 B). The values at  $m/z$  1146, 1174 were identified as  $\alpha$ -mycolic acid methyl esters with C76  
88 and C78 chain length and the values at  $m/z$  1246 to 1330 were identified as free keto-mycolate  
89 with C82 and C88 chain length, a mycolic acid composition expected for *M. bovis* BCG. As  
90 determined by comparison with *M. canetti* lipids (data not shown), the same region contained  
91 peaks corresponding to the PDIM, diacyl phthiocerol (PDIM A) at  $m/z$  1306, 1320, 1334,  
92 1348, 1362, 1390, and diacyl phthiodiolone (PDIM B) at  $m/z$  1290 to 1388 (spaced by 14  
93 mass units)(6). The second series of peaks corresponded to the mass values of *M. bovis*  
94 phenolglycolipids (PGL).

95 The mass spectrum of the  $\Delta cpn60.1$  mutant strain was simpler (Fig. S1B). A series of peaks  
96 corresponding to mycolic acids methyl esters were observed, at  $m/z$  1174 and 1202 for C78-  
97 C80 free acids  $\alpha$ -mycolates and at  $m/z$  1274 and 1302 for the C84 and C86 keto-mycolates  
98 major homologues. The longer chain lengths in  $\alpha$ -mycolates (2 extra carbons) were in  
99 agreement with our previous data (7). A series of minor peaks at higher masses values ( $m/z$   
100 1642-1698) were also detected. The mass spectrum of the lipid extract of the  $\Delta cpn60.1$  mutant  
101 strain clearly confirmed the absence of intact *M. bovis* PDIM and PGL.

102 Interestingly, the phenotype was completely restored in the complemented strain *i.e.* the  
103 presence of PDIM and PGL (Fig S1C), indicative that Cpn60.1 is involved in the synthesis of  
104 these waxes.

105 To elucidate the nature of the minor peaks at higher masses values observed in the mutant  
106 strain (Fig. S1B), a more precise analysis of the glycolipid composition of the mutant strain  
107 was undertaken and the antrone-positive (sugar-containing) compound was isolated by TLC  
108 and analyzed by <sup>1</sup>NMR (data not shown) and MALDI-TOF mass spectrometry (Fig. S1D and  
109 E). The one-dimensional <sup>1</sup>H-NMR spectrum of the glycolipid was similar to that of the *M.*  
110 *bovis* BCG PGL, structurally related to mycoside B. MALDI-TOF mass spectrometry  
111 analyses of the purified PGL from the WT and mutant strains exhibited different profiles. A  
112 series of peaks at *m/z* 1390 to 1600 was observed for WT and the complemented strains while  
113 peaks at higher mass values, around *m/z* 1600 to 1726, were observed for the mutant strain.  
114 The mass spectra of mycoside B from *M. bovis* BCG showed a series of molecular ion  
115 [M+Na]<sup>+</sup> at 1446, 1460, 1474, 1488, 1502, 1516, 1530, 1544, 1588, 1572. For the glycolipid  
116 of the mutant, peaks were seen at *m/z* 1614, 1628, 1642, 1656, 1670, 1684 and 1698, in  
117 agreement with the additional mass values observed in the total mass spectrum of the lipid  
118 from the mutant. Comparative analyses of MALDI-TOF mass spectra performed after acid  
119 methanolysis of WT and mutant lipids showed the loss of 160 mass units corresponding to the  
120 departure of the 2-*O*-methyl rhamnose as characterized by GC/MS analysis and confirmed by  
121 a shift of 72 amu after silylation. This showed that the mass difference in the mutant  
122 concerned the lipid moieties of the glycolipid. By comparison with the PGL aglycone from *M.*  
123 *canettii* (6), the glycolipid from the mutant was found to correspond to the higher mass values  
124 of the aglycone PGL. From all these data, it was concluded that the mycoside B-like  
125 glycolipid isolated from the mutant strain consists of a phenolphthiocerol core with chain

126 lengths that are 6-9 carbon atoms longer than those of the WT and complemented strains and  
127 bearing a 2-*O*-methyl rhamnosyl moiety and polymethyl-branched fatty acyl residues.

128

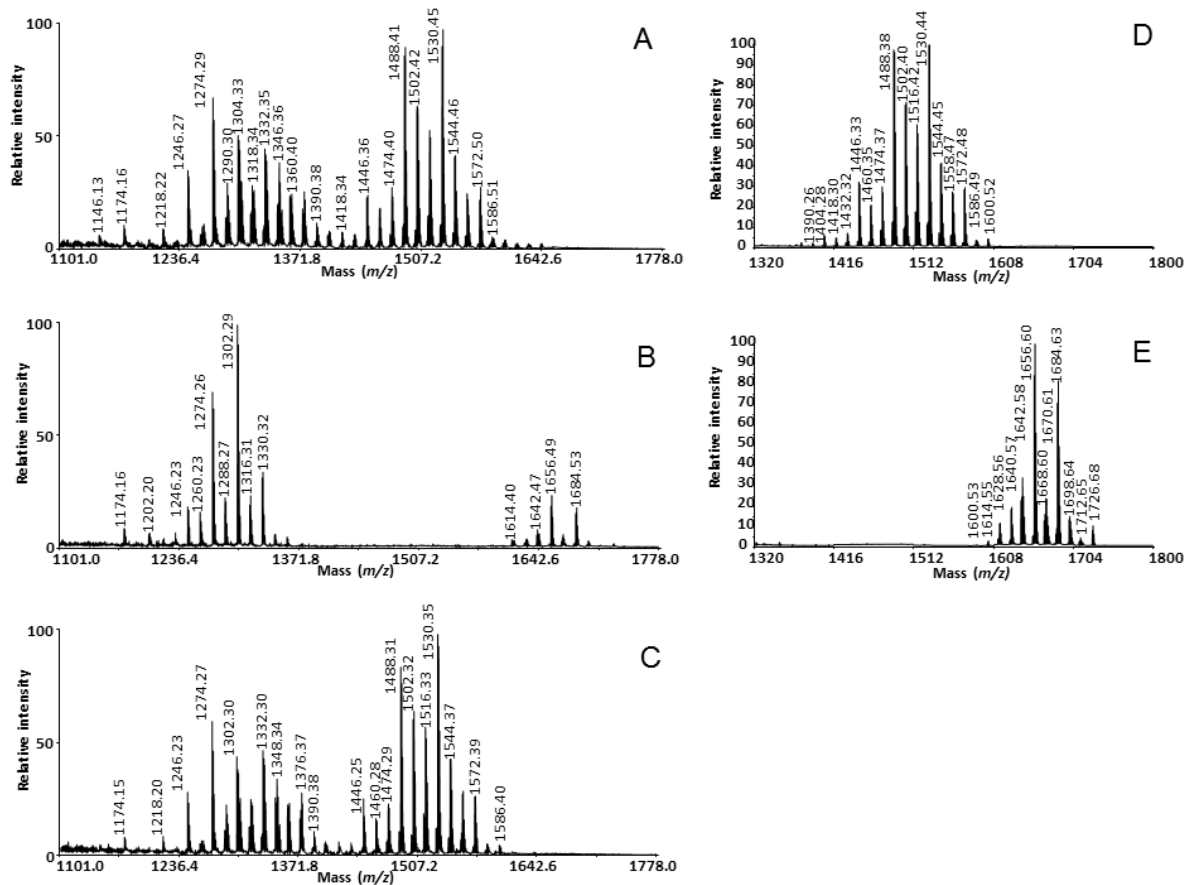

129

130

131 **FIG S1** The lack of Cpn60.1 in a *M. bovis* BCG strain inhibits PDIM and PGL synthesis.

132 Comparative analyses of MALDI-TOF mass spectra of alkali-stable lipids in WT (A, D),

133  $\Delta cpn60-1$  (B, E) and complemented (C) *M. bovis* BCG strains.

134 (A and C): m/z 1174, 1202 for C76 and C78  $\alpha$ -mycolates; m/z 1274, 1302, 1330 for C82 and

135 C88 keto-mycolates,; diacyl phthiocerol (DIM A) at m/z 1306, 1320, 1334, 1348, 1362, 1390)

136 and diacyl phthiodiolone (DIM B) at m/z 1290 to 1388.

137 (B): m/z 1146 to 1230 for C78 and C80  $\alpha$ -mycolates and m/z 1246 to 1330 for C84 and C86

138 keto-mycolates.

139 (A, C, D) mycoside B at m/z 1446, 1460, 1474, 1488, 1502, 1516, 1530, 1544, 1588, 1572.

140 (B, E) mycoside B at m/z 1614, 1628, 1642, 1656, 1670, 1684 and 1698.

141 **REFERENCES**

- 142 1. Constant, P., Perez, E., Malaga, W., Laneelle, M. A., Saurel, O., Daffe, M., and  
143 Guilhot, C. (2002) Role of the pks15/1 gene in the biosynthesis of phenolglycolipids  
144 in the Mycobacterium tuberculosis complex. Evidence that all strains synthesize  
145 glycosylated p-hydroxybenzoic methyl esters and that strains devoid of  
146 phenolglycolipids harbor a frameshift mutation in the pks15/1 gene. *J Biol Chem* **277**,  
147 38148-38158
- 148 2. Rafidinarivo, E., Laneelle, M. A., Montrozier, H., Valero-Guillen, P., Astola, J.,  
149 Luquin, M., Prome, J. C., and Daffe, M. (2009) Trafficking pathways of mycolic  
150 acids: structures, origin, mechanism of formation, and storage form of mycobacteric  
151 acids. *Journal of lipid research* **50**, 477-490
- 152 3. Sweeley, C. C., Bentley, R., Makita, M., and Wells, W. W. (1963) Gas-liquid  
153 chromatography of trimethylsilyl of sugars and related substances. *J. Chem. Soc.* **85**,  
154 2497-2507
- 155 4. Camacho, L. R., Constant, P., Raynaud, C., Laneelle, M. A., Triccas, J. A., Gicquel,  
156 B., Daffe, M., and Guilhot, C. (2001) Analysis of the phthiocerol dimycocerosate  
157 locus of Mycobacterium tuberculosis. Evidence that this lipid is involved in the cell  
158 wall permeability barrier. *J Biol Chem* **276**, 19845-19854
- 159 5. Laval, F., Laneelle, M. A., Deon, C., Monsarrat, B., and Daffe, M. (2001) Accurate  
160 molecular mass determination of mycolic acids by MALDI-TOF mass spectrometry.  
161 *Analytical chemistry* **73**, 4537-4544
- 162 6. Daffe, M., Lacave, C., Laneelle, M. A., and Laneelle, G. (1987) Structure of the major  
163 triglycosyl phenol-phthiocerol of Mycobacterium tuberculosis (strain Canetti). *Eur J*  
164 *Biochem* **167**, 155-160



165 7. Wang, X. M., Lu, C., Soetaert, K., S'Heeren, C., Peirs, P., Laneelle, M. A., Lefevre,  
166 P., Bifani, P., Content, J., Daffe, M., Huygen, K., De Bruyn, J., and Wattiez, R. (2011)  
167 Biochemical and immunological characterization of a cpn60.1 knockout mutant of  
168 *Mycobacterium bovis* BCG. *Microbiology* **157**, 1205-1219

169

170
